# Supplementary material for: A methyl-sensitive element induces bidirectional transcription in TATA-less CpG island-associated promoters
Source: PubMed Central journal article supplement (PMC6192621; doi:10.1371/journal.pone.0205608), 2018-10-17
Supplement: pone.0205608.s010.pdf [file pone.0205608.s010.pdf]

**Table 1. Sequence of oligonucleotides cloned into pGL2-Basic reporter from the DENR Promoter (cloned into pGL2-basic BglII and MluI)**

| Name             | Sequence                                                                          |
|------------------|-----------------------------------------------------------------------------------|
| CGCG #1          | CGCGTCTTCTCGGACACGCTGA                                                            |
| CGCG #1, 2       | CGCGTCTTCCGGCTTCTCGCGACATCCGCCAGCGGCCGCGGAATCTCGCGATACGCTGA                       |
| CGCG #1, 2, 3    | CGCGTCTTCCGGCTTCTCGCGACATCCGCCAGCGGCCGCGGAATCTCGCGATAAAGGCTCATTGTCTCGCGGAGCGCTGA  |
| CTCG #1, 2, 3    | CGCGTCTTCCGGCTTCTCtCGACATCCGCCAGCGGCCGCGGAATCTCtCGATAAAGGCTCATTGTCTCtCGGGAGCGCTGA |
| Motif 10 (BglII) | GATCTTCTCGGAGA                                                                    |
| Motif 7 (BglII)  | GATCTACTACAATTCCCA                                                                |

**Table 2. Primer sequence to clone firefly from pGL2-basic into pRL2-null (cloned into BglII site[GATCT])**

| Name    | Sequence                   |
|---------|----------------------------|
| Forward | GAGATCTAAGTAAGCTTGGCATTCCG |
| Reverse | AAGATCTGACGATAGTCATGCCCGCG |

**Table 3. Site-directed mutagenesis primers used to remove the secondary BglII introduced during the cloning:**

| Name    | Sequence                       |
|---------|--------------------------------|
| Forward | CACATGGCTCGACATATCTGACGATAGTCA |
| Reverse | TGACTATCGTCAGATATGTCGAGCCATGTG |

**Table 4. DENR Promoter fragments:**

| Name           | Sequence                                                                      |
|----------------|-------------------------------------------------------------------------------|
| CGCG #1        | GATCTCGGCTTCTCGCGACAA                                                         |
| CGCG #1, 2     | GATCTCGGCTTCTCGCGACATCCGCCAGCGGGCGCCGGAATCTCGCGATAA                           |
| CGCG #1, 2, 3  | GATCTCGGCTTCTCGCGACATCCGCCAGCGGGCGCCGGAATCTCGCGATAAAGGCTCATTGTCTCGCGGGAGCA    |
| CGACG #1, 2, 3 | GATCTCGGCTTCTCGACGACATCCGCCAGCGGGCGCCGGAATCTCGACGATAAAGGCTCATTGTCTCGACGGGAGCA |

**Table 5. PRDX1 Promoter fragments**

| Name                     | Sequence                                           |
|--------------------------|----------------------------------------------------|
| WT CGCG + WT TATA        | GATCTGGGGCGCTGCCTTTATAGCCAGTAGGGATCTCGCGAGACTCGGAA |
| REV CGCG + WT TATA       | GATCTGGGGCGCTGCCTTTATAGCCAGTAGGGAAGACGGCTGTGTCGGAA |
| WT CGCG + MU TATA (CCTA) | GATCTGGGGCGCTGCCTTCTAGCCAGTAGGGATCTCGCGAGACTCGGAA  |

**Table 6. ZZZ3 Promoter fragments**

| Name                   | Sequence                                                   |
|------------------------|------------------------------------------------------------|
| WT                     | GATCTCCCGCGAGAATCGAGAGATCTCGCGATACAAACCACTCGCATCTCGCGAGCTA |
| Flank-exchanged mutant | GATCTAGACGGCTCCATCGAGAGAATACGGCTCTCAAACCACTCGCAAGCCGCTCTTA |

**Table 7. POLR1C/YIFP3 Promoter fragments**

| Name                 | Sequence                                                                |
|----------------------|-------------------------------------------------------------------------|
| WT CGCG              | GATCTACGGGGCGGGGAAAAATCTCGCGATATTTAAGATTCCAGGAGCGGTGCGTTGCCACGGAGACGGAA |
| Flank-exchanged CGCG | GATCTACGGGGCGGGGAAAAATACGGCTCTTTAAGATTCCAGGAGCGGTGCGTTGCCACGGAGACGGAA   |

**Table 8. CGCG variations**

| Name            | Sequence          |
|-----------------|-------------------|
| WT              | GATCTTCTCGCGAGA   |
| A-insert mutant | GATCTTCTCGACGAGAA |
| CCTCGCGAGA      | GATCTCCTCGCGAGAA  |
| TCTCGCGATG      | GATCTTCTCGCGATGA  |
| TCTCGCGATA      | GATCTTCTCGCGATAA  |

**Table 9. pmCGFP-H2b Reporter (pcil cloning site)**

| Name                   | Sequence                           |
|------------------------|------------------------------------|
| Forward                | gacatgtCCACCATGCCTGAACCTCTAAGTCTGC |
| Reverse                | tcacatgtCCATAGAGCCCACCG            |
| WT                     | CCGTTTCTCGCGAGA                    |
| Flank-exchanged mutant | CCGTTTCTCGCGAGA                    |

**Table 10. CpG-free Lucia (HindIII cloning site)**

| Name            | Sequence         |
|-----------------|------------------|
| WT              | AGCTTTCTCGCGAGAA |
| Flank-exchanged | AGCTTAGACGGCTCTA |

**Table 11. qPCR primers**

| Name    | Forward               | Reverse               |
|---------|-----------------------|-----------------------|
| Firefly | ATAAATAACGCGCCCAACAC  | AGAGATACGCCCTGGTTCCT  |
| Renilla | GTGGTGGGCCAGATGTAAAC  | ATTGCCTGATTGCCATA     |
| AmpR    | TTGCCTTCCTGTTTGGCT    | ATAATACCGGCCACATAGC   |
| DENR    | ACAGTGCCAAGTTAGATGCCG | TCCTTGACCCTACTAATTCCA |
| HPRT1   | ACCAGTCAACAGGGGACATAA | CTTCGTGGGGTCCTTTTACC  |

**Table 12. ChIP primers**

| Name            | Forward              | Reverse              |
|-----------------|----------------------|----------------------|
| LuBiDi Reporter | TACCAACAGTACCGGAATGC | CGACCAACTTCTGCAGTACC |
| GAPDH           | CGGCTACTAGCGGTTTACG  | AAGAAGATCGGGCTGACTGT |

**Table 13. CRISPR/Cas9 guide sequences**

| Name   | Sequence             |
|--------|----------------------|
| sgRNA1 | GTCGCGAGAAGCCGGAAGAC |
| sgRNA2 | ATAAAGGCTCATTGTCTCGC |

**Table 14. PCR primers to screen CRISPR-edited *DENR* promoter**

| Name | Forward              | Reverse             |
|------|----------------------|---------------------|
| DENR | TGCGTCTGCAAGTCACGTTT | CACTCTACGAGCTTCTCGG |

**Table 15. RACE Primers**

| Name                      | Sequence                                     |
|---------------------------|----------------------------------------------|
| Firefly                   | GATTACGCCAAGCTTCCGCGTACGTGATGTTACCTCGAT      |
| Renilla                   | GATTACGCCAAGCTTACCGCGCTACTGGCTCAATATGTGG     |
| GFP                       | AAGTCGTGCTGCTTCATGTG                         |
| Universal Primer Mix long | ctaatacactcactatagggcAAGCAGTGGTATCAACGCAGAGT |
| UPM short                 | ctaatacactcactatagggc                        |
